# Supplementary material for: Facile one-pot preparation of Pd–Au/PEDOT/graphene nanocomposites and their high electrochemical sensing performance for caffeic acid detection
Source: Royal Society of Chemistry journal article supplement (doi:10.1039/c6ra16488a), 2016-01-01
Supplement: c6ra16488a1.pdf [file c6ra16488a1.pdf]

Electronic Supplementary Information:

**Facile one-pot preparation of Pd–Au/PEDOT/graphene nanocomposites and their high electrochemical sensing performance for caffeic acid detection**

Zhen Liu<sup>a,b</sup>, Baoyang Lu<sup>b</sup>, Yansha Gao<sup>b</sup>, Taotao Yang<sup>b</sup>, Ruirui Yue<sup>a,\*</sup>, Jingkun Xu<sup>b,\*</sup>,  
Lei Gao<sup>b</sup>

*<sup>a</sup>College of Life Science, Jiangxi Science and Technology Normal University,  
Nanchang 330013, PR China*

*<sup>b</sup>Jiangxi Key Laboratory of Organic Chemistry, Jiangxi Science and Technology  
Normal University, Nanchang 330013, PR China*

*\*Corresponding authors. Fax: +86-791-83823320, Tel.: +86-791-88537967,*

*E-mail: xujingkun@tsinghua.org.cn(J. Xu)*

*yuerui.923@163.com(R. Yue)*

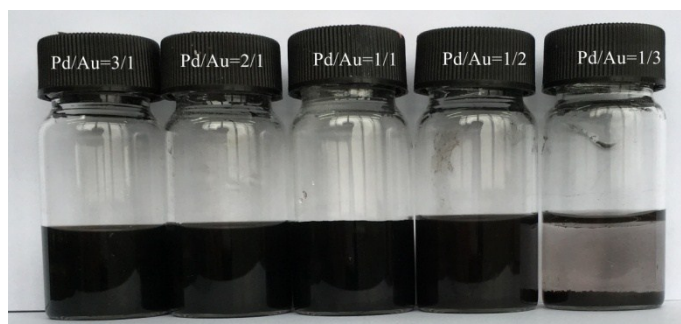

**Fig. S1.** Digital photo of the aqueous dispersions of Pd–Au/PEDOT/rGO with the precursor molar ratios of  $\text{H}_2\text{PdCl}_4$  to  $\text{HAuCl}_4$  are 3:1, 2:1, 1:1, 1:2 and 1:3 after two weeks of static placement.

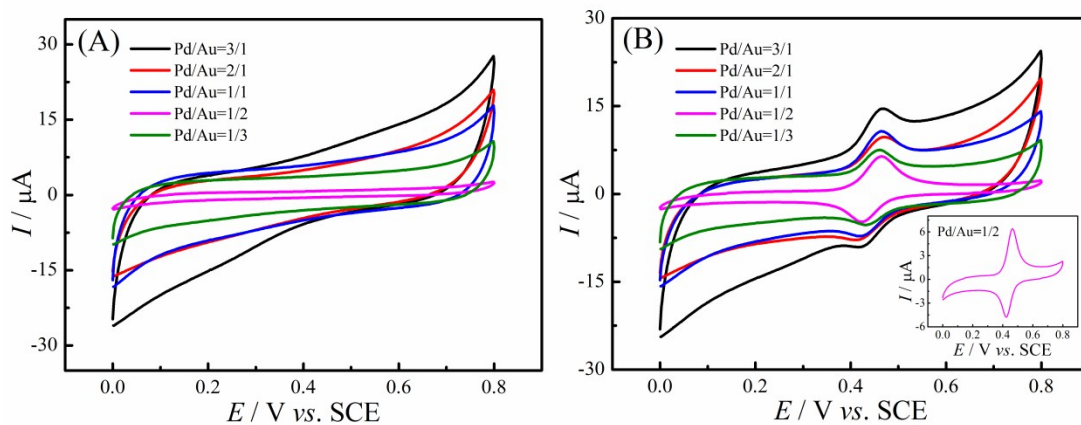

**Fig. S2.** CVs of the Pd–Au/PEDOT/rGO/GCE with Pd/Au molar ratio of 3:1, 2:1, 1:1, 1:2 and 1:3 obtained in (A) the pure BR buffer solution (pH = 3.0) and (B) BR buffer solution (pH = 3.0) containing 50  $\mu\text{M}$  CA at scan rate of 50  $\text{mV s}^{-1}$ .

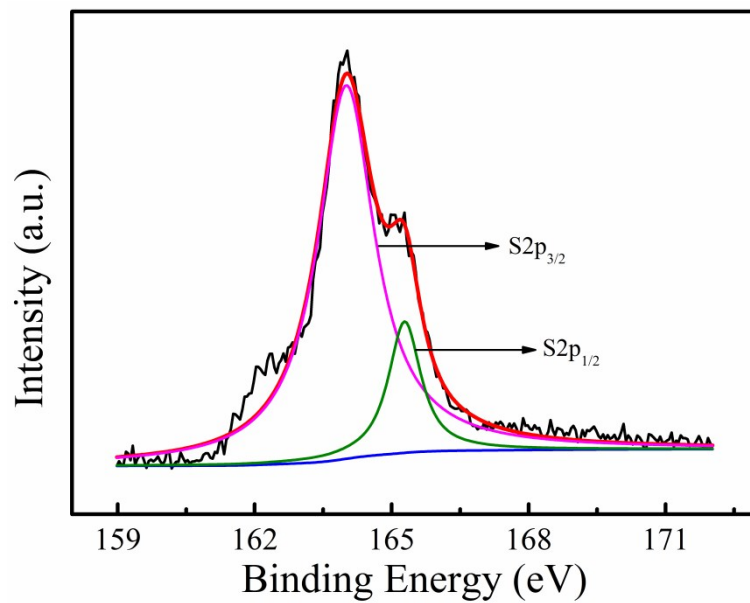

**Fig. S3.** High resolution S2p XPS spectrum of Pd-Au/PEDOT/rGO.

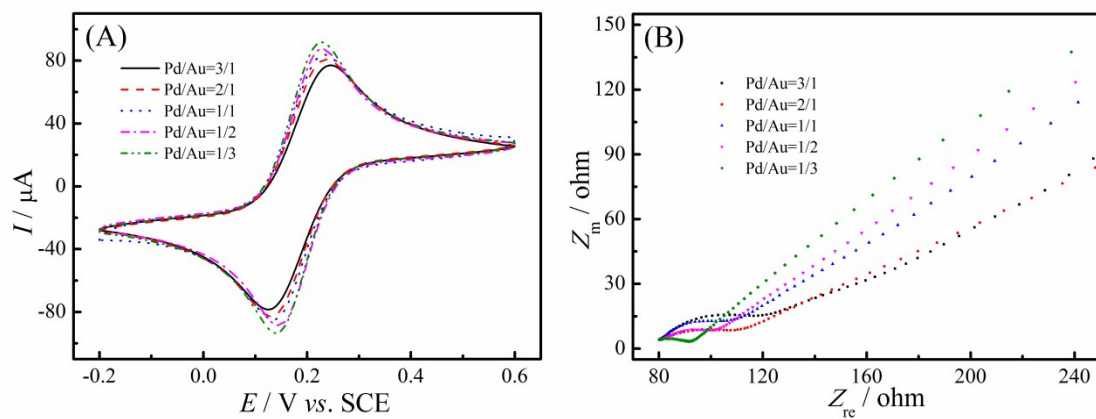

**Fig. S4.** (A) CVs and (B) Nyquist plots of the Pd–Au/PEDOT/rGO/GCE with Pd/Au molar ratio of 3:1, 2:1, 1:1, 1:2 and 1:3 recorded in 5.0 mM  $[\text{Fe}(\text{CN})_6]^{3-/4-}$  (1:1) solution containing 0.1 M KCl, scan rate:  $50 \text{ mV s}^{-1}$ , frequency region from 0.1–100 KHz.

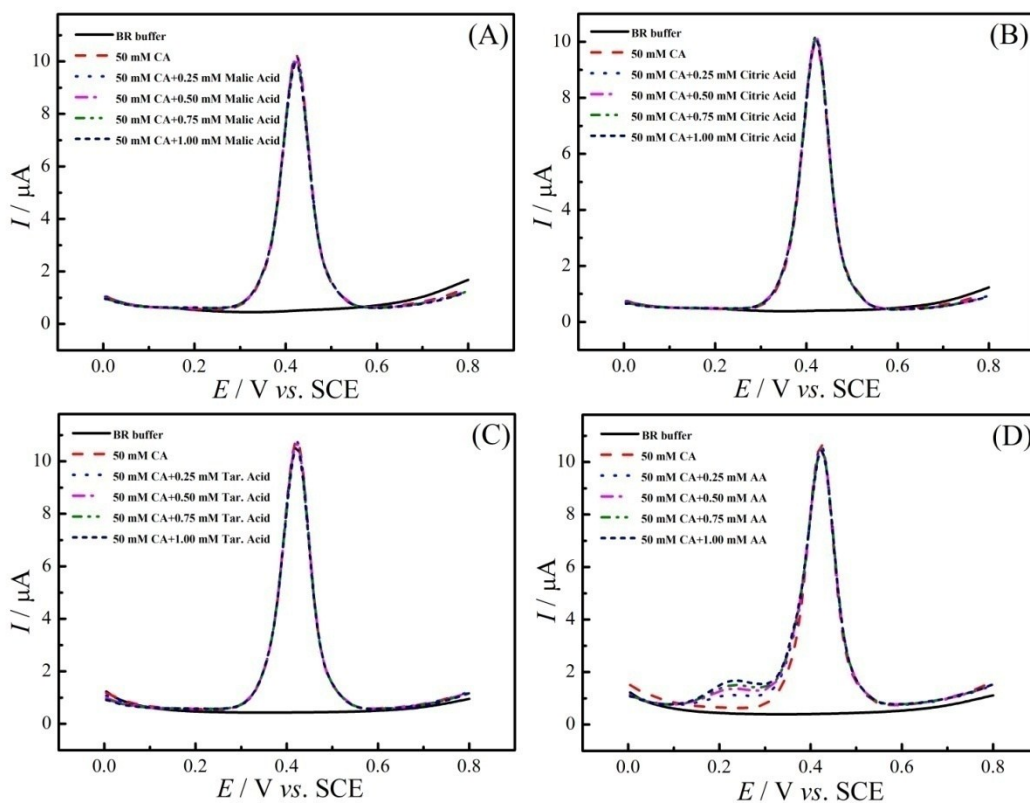

**Fig. S5.** DPVs of Pd–Au/PEDOT/rGO/GCE obtained in BR buffer solution (pH = 3.0) containing 50 $\mu\text{M}$  CA in the presence of different interfering species: (A) malic acid, (B) citric acid, (C) tartaric acid and (D) ascorbic acid at various concentrations.

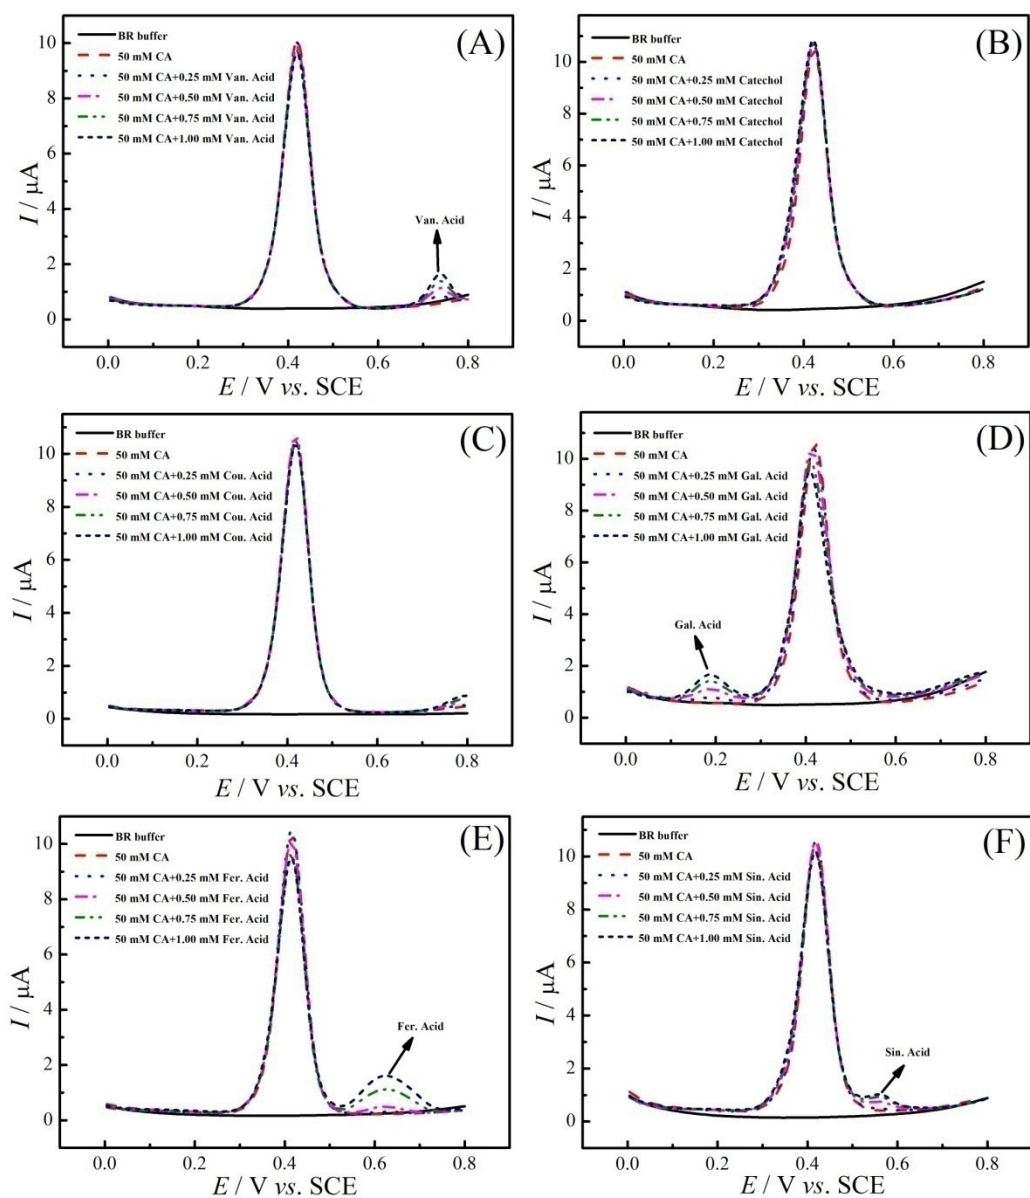

**Fig. S6.** DPVs of Pd–Au/PEDOT/rGO/GCE obtained in BR buffer solution (pH = 3.0) containing 50 μM CA in the presence of different interfering species: (A) vanillic acid, (B) catechol, (C) p-coumaric acid, (D) gallic acid, (E) ferulic acid and (F) sinapic acid at various concentrations.
